# Supplementary material for: Reprogramming Extracellular Vesicles for Protein Therapeutics Delivery
Source: MDPI journal article supplement (doi:10.3390/pharmaceutics13060768), 2021-05-21
Supplement: s1 [file s1]

# Supplementary Materials: Reprogramming Extracellular Vesicles for Protein Therapeutics Delivery

Leyla A. Ovchinnikova, Stanislav S. Terekhov, Rustam H. Ziganshin, Dmitriy V. Bagrov, Ioanna N. Filimonova, Arthur O. Zalevsky and Yakov A. Lomakin

**Table S1.** List of plasmids used for EV production in HEK293T cell line.

| No | Name        | Plasmid                    | DNA Amounts, $\mu$ g per T75 Flask |
|----|-------------|----------------------------|------------------------------------|
| 1. | EV_C        | pCMV-NanoLuc-Jun           | 7.5                                |
|    |             | pCMV-EPN-Fos-C             | 13.5                               |
|    |             | pCMV-VSVG                  | 1.5                                |
| 2. | EV_M        | pCMV-NanoLuc-Jun           | 7.5                                |
|    |             | pCMV-EPN-Fos-M             | 13.5                               |
|    |             | pCMV-VSVG                  | 1.5                                |
| 3. | EV_p6       | pCMV-NanoLuc-Vpr           | 7.5                                |
|    |             | pCMV-Epn-p6                | 13.5                               |
|    |             | pCMV-VSVG                  | 1.5                                |
| 4. | EV_EPN(-)   | pCMV-NanoLuc-Jun           | 7.5                                |
|    |             | pCMV-VSVG                  | 1.5                                |
| 5. | NLuc        | pCMV-NanoLuc-Jun           | 1.5                                |
| 6. | EV_C(lenti) | pLX-NanoLuc-Jun-EPN-C-VSVG | 22.5                               |

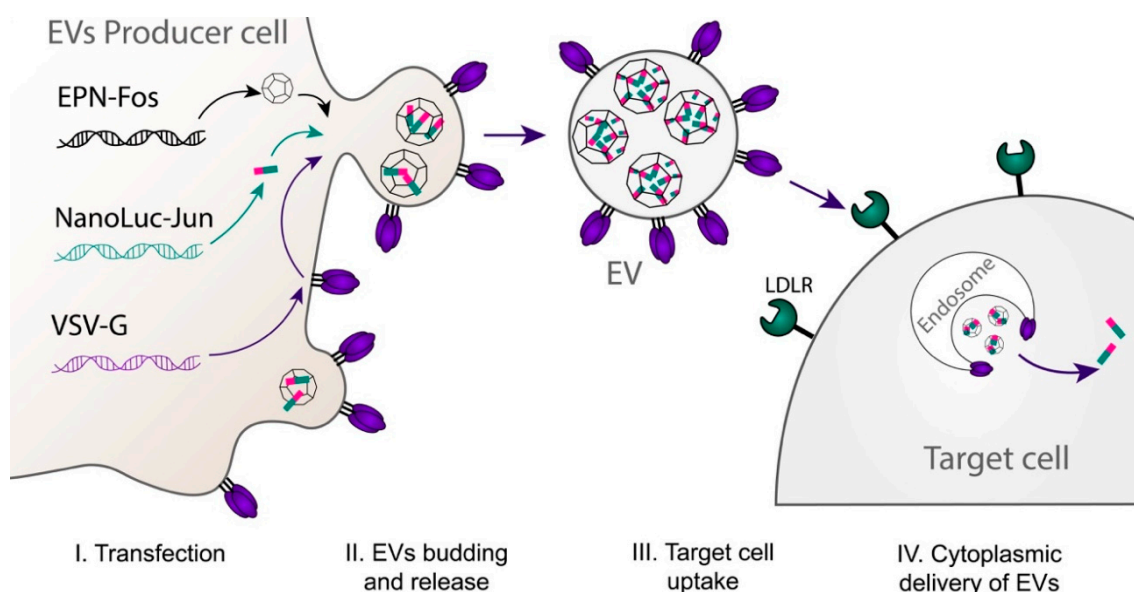

**Figure S1.** Schematic illustration showing the production, assembly, and release of EPNs incorporating NanoLuc and VSV-G proteins. Produced EVs, containing EPN nanocages, loaded with NanoLuc, were delivered to target cells.

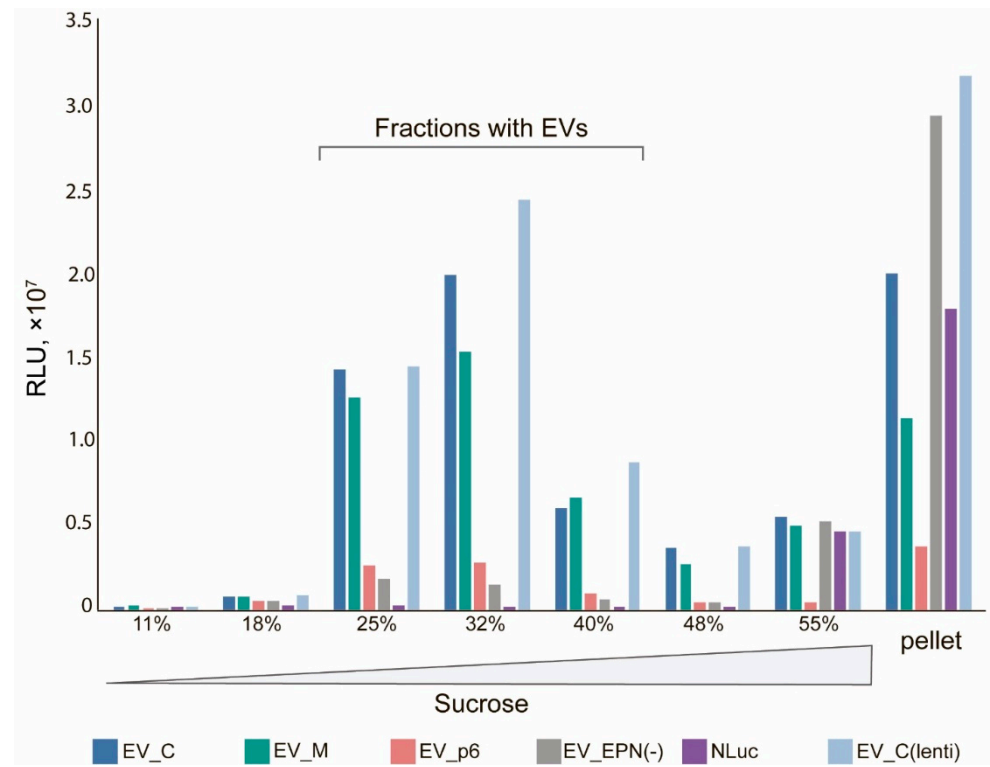

**Figure S2.** Sucrose gradient fractions were analyzed for the presence of NanoLuc-Jun luciferase via NanoGlo assay. Fractions containing 25 to 40% sucrose were identified as enriched in EVs. NanoLuc-Jun, which was not loaded into EVs, was also found in the pellet.

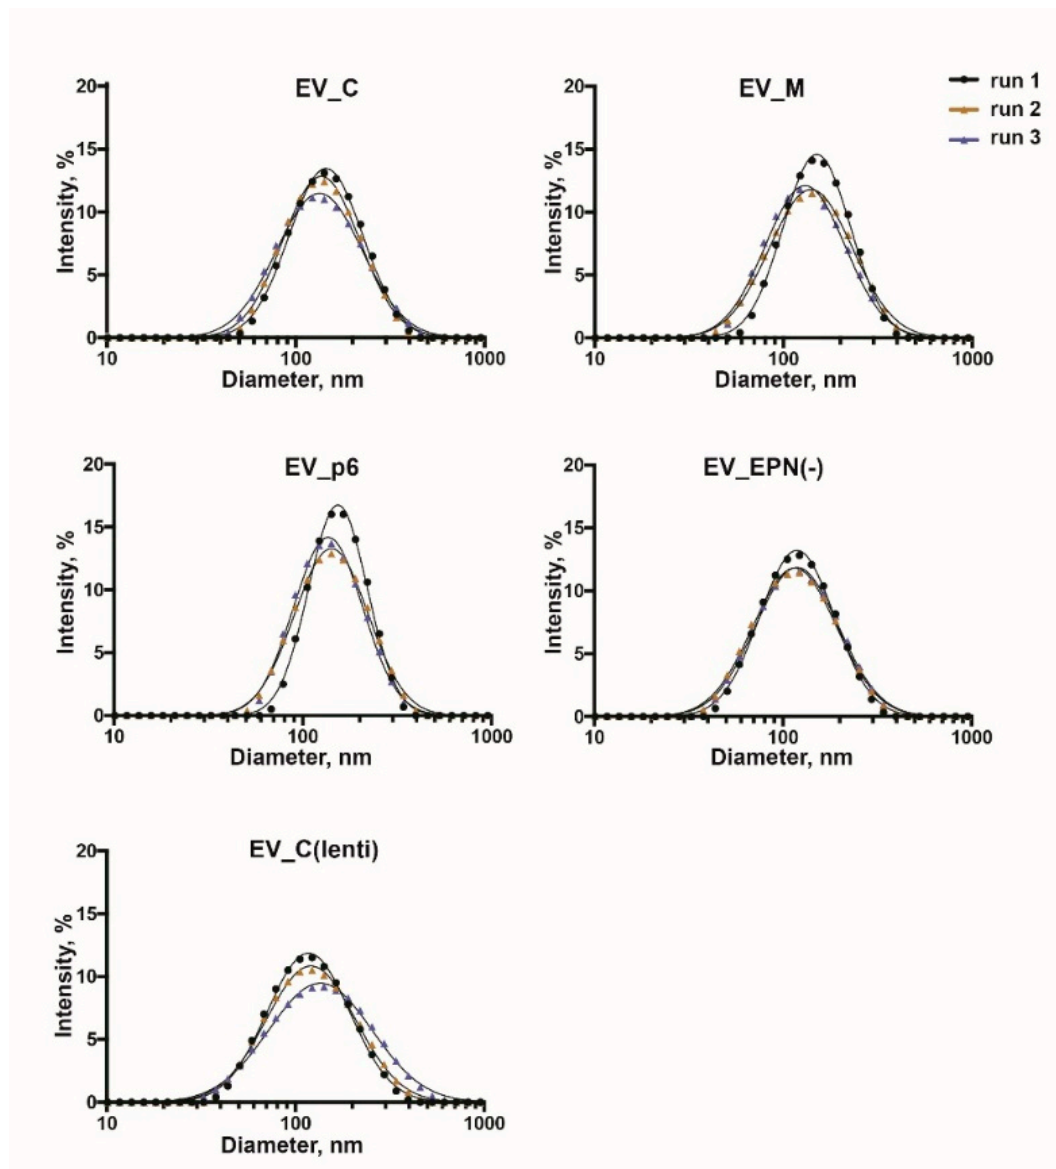

**Figure S3.** Characterization of highly purified EVs. The size distributions of EVs measured by dynamic light scattering (DLS). Each measurement was carried out in triplicate.

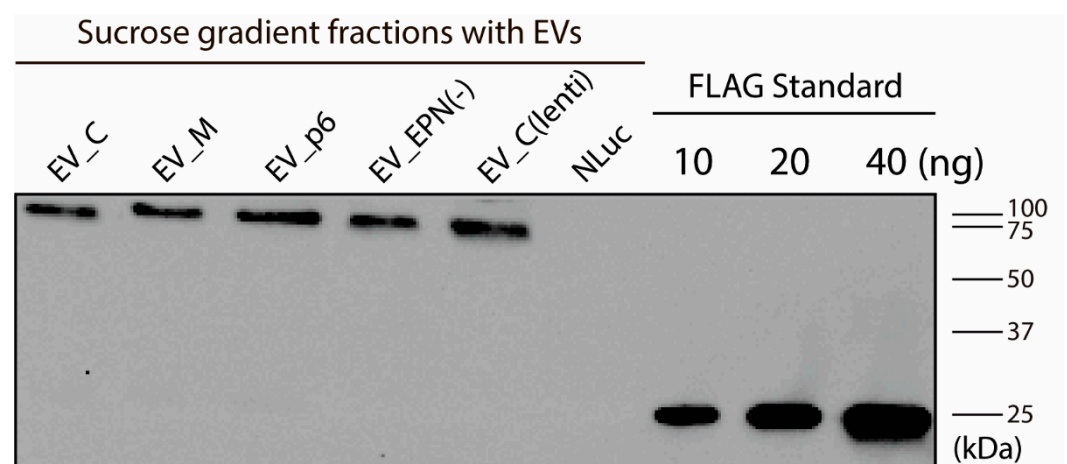

**Figure S4.** Quantitative Western blotting analysis of the amounts of VSV-G-flag in highly purified EVs with equilibrated portion of VSV-G-FLAG. A known amount of recombinant proteins was used as a standard for quantitation. Gel image is representative of 3 individual experiments. "NLuc" sample corresponds to the same fraction of sucrose gradient in which all EVs were found (25–40% sucrose) and was loaded at the maximum volume. Lines with EVs were loaded with

following amounts of total protein: 30 ng of EV\_C, 20 ng of EV\_M, 13 ng of EV\_p6, 17 ng of EV(EPN-), 30 ng of EV\_C(lenti).

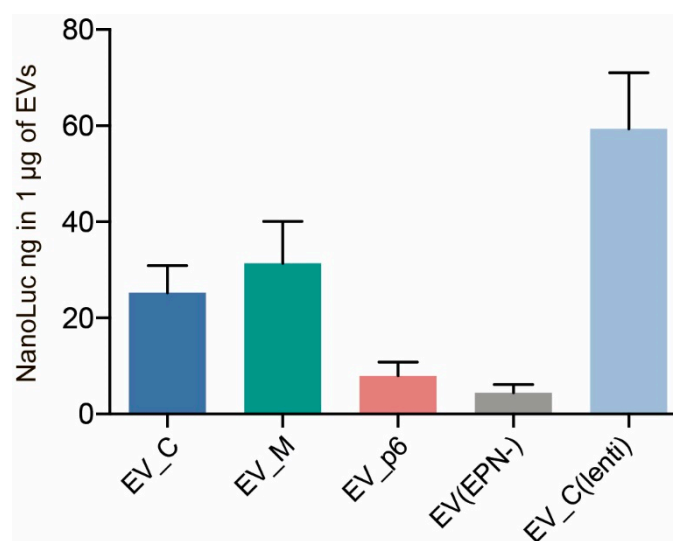

**Figure S5.** Estimated amounts of NanoLuc-Jun cargo protein (ng) in 1 µg of EVs. EVs were purified through sucrose gradient centrifugation. NanoLuc-Jun amounts in EVs were measured via NanoGlo assay, utilizing prokaryotic NanoLuc-Jun protein for plotting a calibration curve. All measurements were taken in triplicate.

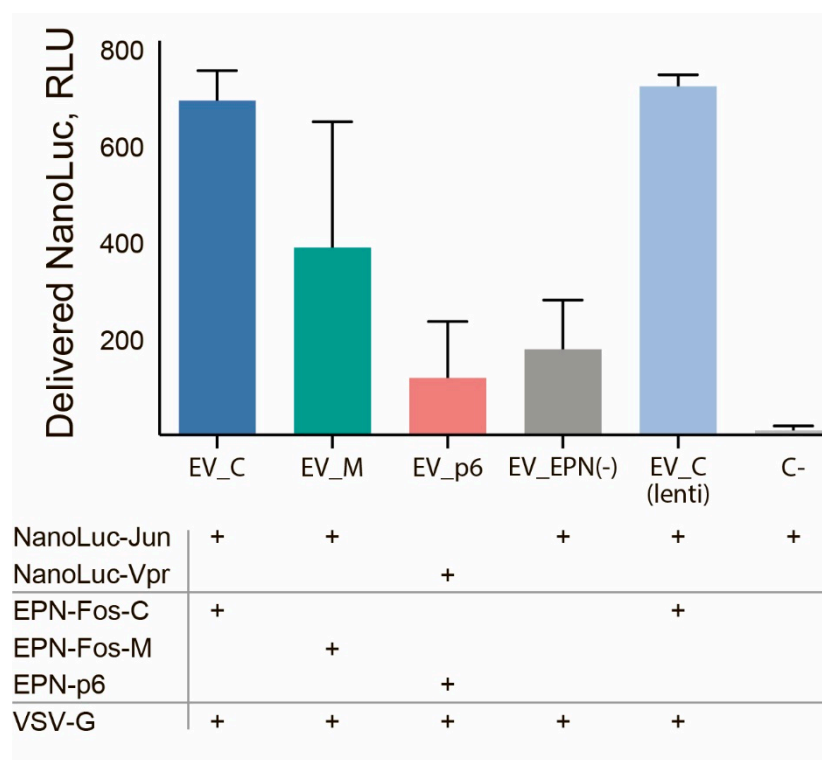

**Figure S6.** The level of delivered NanoLuc in cells after 2 h of incubation. Highly purified EVs with loaded NanoLuc were applied to 40,000 target cells. The amount of added EVs was normalized to NanoLuc portion in each EV sample. Data are mean ± SD, 3 biological repeats were used.
